# Supplementary material for: Towards population screening for Cerebral Visual Impairment: Validity of the Five Questions and the CVI Questionnaire
Source: PLoS One. 2019 Mar 26;14(3):e0214290. doi: 10.1371/journal.pone.0214290 (PMC6435113; doi:10.1371/journal.pone.0214290)
Supplement: S1 Dataset — (XLSX) [file pone.0214290.s001.xlsx]

## Sheet: Sheet1
Unique ID	Age	Sex	ASD	ADHD	Dyscalculia	Dyslexia	Dyspraxia	Total Blindness	OVI	CVI	Deafness	Hearing Impairment	APD	ID	Hydrocephaly	CP	Epilepsy	PVL	Five Questions Cut off	CVI Questionnaire Cut Off
339241-339233-33171953	18.82	1	1	2	2	1	2	2	2	1	2	2	2	1	2	2	2	2	1	1
339241-339233-33173322	11.4	1	2	2	2	2	2	2	1	1	2	2	1	1	2	2	2	1	1	1
339241-339233-33176352	13.02	1	2	1	2	2	1	2	2	1	2	2	1	1	2	2	2	2	1	1
339241-339233-33179110	13.04	1	2	1	2	2	2	2	2	2	2	2	2	2	2	2	2	2	2	2
339241-339233-33181644	5.67	1	2	2	2	2	2	2	2	2	2	2	2	2	2	2	2	2	2	2
339241-339233-33182494	10.61	1	2	2	2	1	2	2	2	2	2	2	2	2	2	2	2	2	2	2
339241-339233-33184660	5.53	1	2	2	2	2	2	2	2	2	2	2	2	2	2	2	2	2	2	2
339241-339233-33185493	7.12	1	2	2	2	2	2	2	2	2	2	2	2	2	2	2	2	2	2	2
339241-339233-33190698	14.16	1	2	2	2	2	2	1	2	2	2	2	2	1	2	2	1	2	1	1
339241-339233-33191996	15.01	1	1	2	1	2	2	2	1	1	2	2	2	2	2	2	2	2	1	1
339241-339233-33194545	14.54	2	2	2	2	2	2	2	2	1	2	1	1	1	1	1	1	1	1	1
339241-339233-33194594	15.01	1	1	2	1	2	1	2	2	1	2	2	2	1	2	2	2	2	1	1
339241-339233-33194996	6.37	1	2	2	2	2	2	2	2	1	2	2	2	2	2	2	1	1	1	1
339241-339233-33195937	14.41	2	2	1	2	1	1	2	1	1	2	2	1	1	2	2	1	2	1	1
339241-339233-33195960	13.24	1	2	2	1	2	1	2	1	2	1	1	2	2	2	2	2	2	1	1
339241-339233-33196407	14.42	1	1	2	1	1	1	2	2	1	2	2	1	1	2	2	2	2	1	1
339241-339233-33197071	16.84	2	1	2	2	2	2	2	2	2	1	1	1	1	2	2	2	2	2	1
339241-339233-33197333	6.92	2	2	1	2	1	2	2	2	1	2	2	2	2	2	2	1	1	1	1
339241-339233-33197587	12.2	1	2	2	2	2	2	2	2	1	1	1	1	1	2	2	2	1	1	1
339241-339233-33198163	17.69	2	2	2	2	1	2	2	2	1	2	2	2	1	2	2	1	1	1	1
339241-339233-33198781	8.91	1	1	2	2	2	2	2	2	1	2	2	1	1	2	2	2	2	1	1
339241-339233-33198959	11.69	2	2	2	2	2	2	2	2	1	2	2	2	2	2	2	2	1	1	1
339241-339233-33199116	9.49	2	2	2	2	1	2	2	2	1	2	2	2	1	2	2	1	1	1	1
339241-339233-33199447	15.56	1	1	2	2	1	2	2	2	1	2	2	1	1	2	2	2	2	1	1
339241-339233-33199548	7.68	2	1	2	2	1	2	2	1	1	2	1	1	1	2	2	1	1	1	1
339241-339233-33199590	6.88	1	2	2	2	2	2	2	2	1	2	2	2	2	2	2	1	1	1	1
339241-339233-33199646	7.95	1	2	2	2	2	2	2	2	1	2	2	2	2	2	2	2	2	1	1
339241-339233-33200200	11.74	1	2	2	1	1	1	2	2	1	2	2	1	2	2	1	1	1	1	1
339241-339233-33200529	9.12	2	2	2	2	2	2	2	2	1	2	2	2	1	1	2	1	1	1	1
339241-339233-33200653	18.72	2	2	1	2	1	2	2	2	2	2	2	2	2	2	2	2	2	2	1
339241-339233-33200755	13.06	1	1	2	2	2	2	2	2	2	2	2	2	2	2	2	2	2	2	1
339241-339233-33201055	17.61	1	1	1	2	2	2	2	1	2	2	2	2	1	2	2	2	2	2	1
339241-339233-33201320	7.66	1	2	2	2	2	2	2	2	1	2	2	2	2	2	2	1	1	1	1
339241-339233-33202308	7.15	1	2	2	2	2	2	1	2	1	2	2	2	1	1	1	1	1	1	1
339241-339233-33202931	5.84	1	2	1	2	2	2	2	2	2	2	2	1	1	2	2	2	2	1	1
339241-339233-33203190	8.39	1	1	2	2	2	2	2	2	2	2	2	1	2	2	2	2	2	2	1
339241-339233-33203406	8.01	1	2	2	2	2	2	2	2	2	2	2	2	2	2	2	2	2	2	2
339241-339233-33204740	11.36	1	2	2	2	1	2	2	2	2	2	2	2	2	2	2	2	2	2	2
339241-339233-33205156	12.91	2	1	2	2	2	1	2	2	2	2	2	2	1	2	2	2	2	1	1
339241-339233-33205857	13.39	1	2	2	2	2	2	2	2	2	2	2	2	2	2	2	2	2	2	1
339241-339233-33207539	13.57	1	2	2	2	2	2	2	2	2	2	2	1	2	2	2	2	2	2	2
339241-339233-33208509	14.27	2	2	2	1	1	2	2	2	1	2	2	2	1	2	2	1	1	1	1
339241-339233-33209026	7.26	1	2	1	1	1	2	2	2	2	2	2	1	1	2	2	2	2	2	2
339241-339233-33210540	17.27	2	2	2	2	2	2	2	1	1	2	2	2	1	2	2	1	1	1	1
339241-339233-33211348	8.16	1	2	2	2	2	2	2	2	2	2	2	2	2	2	2	2	2	2	2
339241-339233-33211836	15.48	2	2	2	2	2	2	2	1	2	2	2	2	1	2	2	2	2	2	1
339241-339233-33212193	15.12	1	2	2	2	2	2	2	2	1	2	2	2	1	2	2	1	2	1	1
339241-339233-33212906	11.16	2	2	2	2	2	2	2	2	1	2	2	1	1	2	2	2	2	1	1
339241-339233-33214325	5.63	2	2	2	2	2	2	2	2	2	2	2	2	2	2	2	2	2	2	2
339241-339233-33214463	5.24	2	2	2	2	2	2	2	2	2	2	2	2	1	2	2	2	2	2	1
339241-339233-33215249	6.58	2	2	2	2	2	2	2	2	2	2	2	2	2	2	2	2	2	2	2
339241-339233-33215750	7.78	2	1	2	2	2	2	2	2	1	2	2	2	2	2	2	2	2	1	1
339241-339233-33216612	7.98	2	1	1	1	1	1	2	2	1	2	1	1	1	2	2	2	2	1	1
339241-339233-33217531	9.63	2	2	2	2	1	2	2	2	2	2	2	2	2	2	2	2	2	2	1
339241-339233-33217657	10.43	1	2	2	2	2	2	2	2	2	2	2	1	2	2	2	2	2	2	1
339241-339233-33222604	12.78	1	2	2	2	2	2	2	2	2	2	2	2	2	2	2	2	2	2	2
339241-339233-33223089	14.19	1	2	2	2	2	2	2	2	2	2	2	2	2	2	2	2	2	2	2
339241-339233-33223184	5.31	1	2	1	2	2	2	2	2	1	2	2	2	1	2	2	1	2	1	1
339241-339233-33223805	6.98	2	2	2	2	2	2	2	2	2	2	2	2	2	2	2	2	2	2	2
339241-339233-33236078	7.44	1	1	2	2	2	2	2	2	2	2	1	2	1	2	2	1	2	2	1
339241-339233-33242684	8.01	1	1	2	2	2	2	2	2	2	2	2	2	2	2	2	2	2	2	1
339241-339233-33244496	8.48	1	1	1	2	1	2	2	2	2	2	2	2	2	2	2	2	2	2	1
339241-339233-33247481	9.19	2	2	2	2	2	2	2	2	2	2	2	2	2	2	2	1	2	1	1
339241-339233-33251200	9.27	1	1	2	2	2	1	2	2	2	2	2	1	1	2	2	2	2	1	1
339241-339233-33252814	9.86	1	1	1	2	1	2	2	2	2	2	2	1	2	2	2	2	2	2	1
339241-339233-33253492	10.39	1	2	2	2	2	2	2	2	1	2	2	2	2	2	2	2	2	1	1
339241-339233-33256130	10.56	1	1	1	2	2	1	2	2	2	2	2	2	2	2	2	2	2	2	1
339241-339233-33257692	10.82	1	2	2	1	2	1	2	2	2	2	2	1	1	2	2	2	2	1	2
339241-339233-33262917	11.79	2	2	1	2	1	2	2	2	1	2	2	2	1	2	2	2	2	2	1
339241-339233-33264345	12.01	1	1	1	2	2	2	2	2	1	2	2	2	2	2	2	2	2	2	1
339241-339233-33267939	12.3	2	2	2	2	2	2	2	2	2	2	2	2	2	2	2	2	2	2	2
339241-339233-33273224	13.88	1	2	2	2	1	2	2	1	1	2	2	2	2	2	2	2	2	1	1
339241-339233-33274904	14.77	2	1	2	2	2	1	2	2	1	2	2	1	2	1	2	2	2	1	1
339241-339233-33278299	14.82	2	1	2	1	2	1	2	2	1	2	2	1	2	2	2	2	2	1	1
339241-339233-33287494	15.14	1	2	2	2	2	2	2	2	1	2	2	2	1	2	2	1	1	1	1
339241-339233-33289271	5.47	2	2	2	2	2	2	2	2	2	2	2	2	2	2	2	2	2	2	2
339241-339233-33307564	6.36	2	2	2	2	2	2	2	2	2	2	2	2	2	2	2	2	2	2	2
339241-339233-33311001	6.39	2	2	2	2	2	2	2	2	2	2	2	2	2	2	2	2	2	2	2
339241-339233-33316433	7.94	1	2	2	2	2	2	1	2	2	2	2	2	2	2	2	2	2	1	1
339241-339233-33323425	7.95	1	1	1	2	2	1	2	2	2	2	2	2	2	2	2	2	2	2	1
339241-339233-33328089	7.95	1	2	1	2	1	2	2	1	2	2	2	1	1	2	2	2	2	2	2
339241-339233-33339488	9.07	2	1	1	2	2	2	2	1	2	2	2	2	2	2	2	2	2	2	2
339241-339233-33345050	9.26	1	1	2	2	2	1	2	2	1	2	2	1	1	2	1	2	2	1	1
339241-339233-33362486	9.55	1	1	2	2	2	2	2	1	2	2	2	2	1	2	2	2	2	1	1
339241-339233-33362683	10.63	1	2	2	2	2	2	2	2	2	2	2	2	2	2	2	2	2	2	2
339241-339233-33362716	9.56	1	1	1	1	1	1	2	2	1	2	2	1	1	1	1	2	1	1	1
339241-339233-33362864	11.48	2	1	2	2	2	1	2	2	2	2	2	2	1	2	2	2	2	2	1
339241-339233-33362890	11.67	1	2	1	1	1	2	2	2	2	2	2	2	2	2	2	2	2	2	2
339241-339233-33362900	12.89	1	2	2	2	2	2	2	2	2	2	2	2	1	2	1	2	2	2	1
339241-339233-33363010	14.24	1	2	1	2	2	2	2	2	2	2	2	1	2	2	2	2	2	2	1
339241-339233-33363135	14.97	2	2	2	2	2	2	2	2	2	1	1	2	2	2	2	2	2	2	2
339241-339233-33364514	15.09	1	1	2	2	2	1	2	2	2	2	2	2	2	2	2	2	2	2	2
339241-339233-33364923	15.96	1	1	1	2	2	2	2	2	2	2	2	2	1	2	2	2	2	2	1
339241-339233-33366233	16.76	1	1	1	1	1	1	2	2	2	2	2	2	1	2	2	2	2	2	1
339241-339233-33366420	17.54	1	1	2	2	2	2	2	1	2	2	2	2	1	2	2	2	2	1	1
339241-339233-33369152	17.66	2	2	2	2	2	2	2	2	2	2	2	2	2	2	1	2	2	2	2
339241-339233-33369236	17.71	2	1	2	2	2	2	2	2	2	2	2	1	2	2	2	2	2	2	2
339241-339233-33369378	5.31	2	2	2	2	2	2	2	2	2	2	2	2	2	2	2	2	2	2	2
339241-339233-33371613	5.31	1	1	1	2	2	1	2	2	2	1	1	2	1	2	2	2	2	1	1
339241-339233-33372639	5.48	1	2	2	2	2	2	2	2	2	2	2	2	2	2	2	2	2	2	2
339241-339233-33377106	5.52	1	2	2	2	2	2	2	2	2	2	2	2	2	2	2	2	2	2	2
339241-339233-33390695	5.56	1	1	2	2	2	2	2	2	1	2	2	2	1	2	1	2	2	1	1
339241-339233-33400960	6.4	1	2	2	2	2	2	2	2	2	2	2	2	2	2	2	2	2	2	1
339241-339233-33432947	6.79	2	2	2	2	2	2	2	2	2	2	2	2	2	2	2	2	2	2	2
339241-339233-33434743	7.16	2	2	2	2	2	2	2	2	2	2	2	2	2	2	2	2	2	2	2
339241-339233-33439302	7.26	1	1	1	2	2	2	2	2	2	2	2	1	2	2	2	2	2	1	1
339241-339233-33449546	7.34	2	2	2	2	2	2	2	2	2	2	2	2	2	2	2	2	2	2	2
339241-339233-33453271	7.6	2	2	1	2	1	2	2	2	2	2	2	2	2	2	2	2	2	2	1
339241-339233-33454347	7.69	1	2	2	2	2	2	2	2	1	2	2	2	1	2	1	1	2	1	1
339241-339233-33459350	7.78	1	2	1	2	1	2	2	2	2	2	2	2	2	2	2	2	2	1	1
339241-339233-33463663	8.14	1	1	1	2	2	2	2	2	2	2	2	2	1	2	2	2	2	1	1
339241-339233-33466786	8.25	1	2	1	2	2	2	2	2	2	2	2	1	1	2	2	2	2	2	1
339241-339233-33466888	8.52	1	1	2	2	2	2	2	2	2	2	2	2	2	2	2	2	2	2	2
339241-339233-33467375	8.34	1	2	2	2	1	2	2	2	2	2	2	1	2	2	2	2	2	2	2
339241-339233-33469220	8.7	1	2	2	2	2	2	2	2	1	2	2	1	2	2	2	2	2	2	1
339241-339233-33469841	9.55	1	2	2	2	2	2	2	2	2	2	2	2	2	2	2	2	2	2	2
339241-339233-33469862	8.91	1	2	2	2	2	2	2	2	2	2	2	2	2	2	2	2	2	2	2
339241-339233-33469894	9.05	1	1	2	2	1	2	2	2	2	2	2	1	1	2	2	2	2	2	1
339241-339233-33471782	10.59	1	2	1	2	2	2	2	2	2	2	2	2	1	2	2	2	2	2	2
339241-339233-33471901	9.69	2	2	2	2	2	2	2	2	2	2	2	2	2	2	2	2	2	2	2
339241-339233-33472187	10.83	2	2	2	1	1	2	2	2	2	2	2	2	1	2	2	2	2	2	1
339241-339233-33473006	11.3	1	2	1	2	2	2	2	1	2	2	2	2	1	2	2	2	2	2	2
339241-339233-33473308	11.54	1	1	2	2	2	2	2	1	2	2	2	2	2	2	2	2	2	2	1
339241-339233-33473319	11.73	1	2	1	2	2	2	2	2	2	2	2	1	2	2	2	2	2	2	2
339241-339233-33473506	11.88	2	2	2	2	2	1	2	2	1	2	2	2	1	2	2	2	2	1	1
339241-339233-33473599	12.9	2	1	2	2	2	2	2	2	2	2	2	2	1	2	1	2	2	2	1
339241-339233-33473934	18.25	2	2	2	2	2	2	2	2	2	2	2	2	2	2	2	2	2	2	2
339241-339233-33474215	16.08	2	2	2	2	2	2	2	2	2	2	2	2	2	2	2	2	2	2	2
339241-339233-33475132	18.66	1	1	2	2	2	2	2	2	2	2	2	2	2	2	2	2	2	2	1
339241-339233-33475307	5.19	1	2	2	2	2	2	2	2	2	1	1	2	1	2	2	2	2	1	1
339241-339233-33475483	5.23	2	2	1	1	2	2	2	2	2	2	2	1	1	2	2	2	2	2	1
339241-339233-33475749	5.32	2	2	2	2	2	2	2	1	2	2	2	2	2	2	2	2	2	1	2
339241-339233-33475764	5.46	1	2	2	2	2	2	2	1	2	2	2	2	2	2	2	2	2	2	1
339241-339233-33476161	5.48	2	2	2	2	2	2	2	2	2	2	2	2	2	2	2	2	2	2	2
339241-339233-33476222	5.57	1	2	2	2	2	2	2	2	2	2	2	2	2	2	2	2	2	2	2
339241-339233-33476229	5.83	2	2	2	2	2	1	2	2	2	2	2	2	1	2	2	2	2	2	2
339241-339233-33476461	6.51	1	1	2	1	1	2	2	2	1	2	2	1	1	2	2	2	2	1	1
339241-339233-33476815	5.84	2	2	2	2	2	2	2	2	2	2	2	2	2	2	2	2	2	2	2
339241-339233-33476859	5.93	2	2	2	2	2	2	2	2	2	2	2	2	2	2	2	2	2	2	2
339241-339233-33477065	7.25	1	2	2	2	2	2	2	2	2	2	2	2	2	2	2	2	2	2	2
339241-339233-33477268	6.33	1	2	1	2	2	2	2	2	2	2	2	2	2	2	1	2	2	2	2
339241-339233-33477432	6.11	1	1	2	2	2	2	2	2	2	2	2	2	2	2	2	2	2	1	1
339241-339233-33477434	6.14	1	1	1	2	2	2	2	2	2	2	2	2	1	2	2	2	2	1	1
339241-339233-33478020	6.63	1	2	2	2	2	2	2	2	2	2	2	2	2	2	2	2	2	2	2
339241-339233-33478133	6.53	2	2	2	2	2	2	2	2	2	2	1	2	2	2	2	2	2	2	2
339241-339233-33478371	7.23	2	2	2	2	2	2	2	1	2	2	1	2	1	2	2	2	2	1	1
339241-339233-33478404	7.14	1	1	1	2	2	2	2	2	2	2	2	2	2	2	2	2	2	1	1
339241-339233-33478586	6.78	2	2	2	2	2	2	2	2	2	2	2	2	2	2	2	2	2	2	2
339241-339233-33479439	8.15	1	2	2	2	1	2	2	2	2	2	2	1	1	2	1	2	2	2	2
339241-339233-33479638	7.61	2	2	2	2	2	2	2	2	2	2	2	2	1	2	2	2	2	1	1
339241-339233-33479779	7.44	2	1	2	2	2	2	2	2	1	2	2	2	2	2	2	2	2	1	1
339241-339233-33480967	8.02	1	1	2	2	2	2	2	2	2	2	2	1	1	2	2	2	2	2	1
339241-339233-33482211	8.2	1	2	2	2	2	2	2	2	2	2	2	2	2	2	2	2	2	2	2
339241-339233-33482681	8.25	2	1	1	2	2	2	2	2	2	2	2	2	2	2	2	2	2	2	1
339241-339233-33483326	8.53	1	2	2	2	2	2	2	2	1	2	2	2	1	1	1	1	2	1	1
339241-339233-33484369	8.55	1	1	2	2	2	2	2	2	2	2	2	2	1	2	2	2	2	2	1
339241-339233-33485550	8.77	2	2	2	2	1	1	2	2	2	2	2	1	2	2	2	2	2	1	1
339241-339233-33485946	8.87	1	2	2	1	2	1	2	1	1	2	2	2	1	2	2	1	2	1	1
339241-339233-33488025	9.08	1	2	2	2	2	2	2	2	1	2	1	1	1	2	2	2	2	1	1
339241-339233-33488323	9.24	1	1	2	2	2	2	2	2	2	2	2	2	1	2	2	2	2	1	1
339241-339233-33488656	9.54	2	2	2	2	2	2	2	1	2	2	2	1	1	2	2	2	2	2	2
339241-339233-33488947	9.62	2	2	2	2	2	2	2	1	2	2	2	2	2	2	1	2	2	2	2
339241-339233-33489078	9.68	2	2	2	1	1	2	2	1	1	2	2	1	1	2	2	2	2	1	1
339241-339233-33489343	9.76	1	2	2	2	2	2	2	2	2	2	2	2	2	2	2	2	2	2	2
339241-339233-33490372	9.89	2	2	2	1	1	2	2	2	2	2	2	1	1	2	2	2	2	2	1
339241-339233-33493406	9.97	2	2	2	2	2	2	2	2	2	2	2	2	2	2	2	2	2	2	2
339241-339233-33493449	10.11	2	2	2	2	2	1	2	2	2	2	2	2	2	2	2	2	2	2	1
339241-339233-33493866	10.17	1	1	2	2	2	2	2	2	2	2	2	2	1	2	2	2	2	2	1
339241-339233-33494137	10.46	1	2	2	2	1	1	2	2	2	2	2	2	1	2	2	2	2	2	2
339241-339233-33495472	10.48	1	2	2	2	1	1	2	2	2	2	2	2	1	2	2	2	2	2	1
339241-339233-33495996	10.49	2	2	2	2	2	1	2	2	2	2	2	2	2	2	2	2	2	2	2
339241-339233-33498620	10.68	1	2	2	2	2	2	2	2	2	2	2	2	2	2	2	2	2	2	2
339241-339233-33498852	11.02	2	2	2	2	2	2	2	2	2	2	2	2	2	2	2	2	2	2	2
339241-339233-33499312	11.03	1	1	1	2	2	2	2	2	2	2	2	2	2	2	2	2	2	2	1
339241-339233-33499430	11.3	2	2	2	2	2	2	2	1	2	2	2	2	2	2	2	2	2	2	2
339241-339233-33499563	11.18	1	1	2	2	1	2	2	2	1	2	2	2	1	2	2	2	1	1	1
339241-339233-33499611	11.24	1	1	2	2	2	2	2	1	2	2	2	2	1	2	2	2	1	1	1
339241-339233-33499884	11.81	2	2	2	1	1	2	2	1	2	2	2	1	2	2	2	2	2	2	1
339241-339233-33500028	11.34	2	2	1	2	1	2	2	2	1	2	2	2	1	2	2	2	2	2	1
339241-339233-33500057	11.83	2	1	2	2	2	2	2	1	1	2	2	1	1	2	1	1	1	1	1
339241-339233-33500462	12.41	2	2	2	2	2	2	2	2	2	2	2	2	2	2	2	2	2	2	2
339241-339233-33500540	11.87	1	2	2	2	2	1	2	1	1	2	2	2	1	2	2	2	2	1	1
339241-339233-33500627	12.24	2	2	2	2	2	2	2	2	1	2	1	1	1	1	2	2	1	1	1
339241-339233-33500969	12.48	1	1	2	2	2	2	2	2	1	2	2	2	1	2	2	2	2	1	1
339241-339233-33501177	12.58	1	2	2	2	2	2	2	2	2	2	2	1	2	2	2	2	2	2	1
339241-339233-33501544	13.38	1	2	2	2	1	2	2	2	2	2	2	1	1	2	2	2	2	2	2
339241-339233-33501931	13.46	1	2	2	2	2	2	2	1	2	2	2	2	1	2	2	2	2	2	1
339241-339233-33502141	14	1	1	2	2	2	2	2	2	2	2	2	2	2	2	2	2	2	2	2
339241-339233-33502420	14.15	2	2	2	2	2	2	2	2	2	2	2	2	2	2	2	2	2	2	2
339241-339233-33503016	14.31	1	2	2	2	2	2	2	2	2	2	2	2	2	2	2	2	2	2	2
339241-339233-33505117	14.47	2	2	2	2	2	2	2	2	1	2	2	2	2	2	2	2	2	2	1
339241-339233-33505128	14.63	2	2	2	2	1	2	2	2	2	2	2	1	2	2	2	2	2	2	2
339241-339233-33505340	14.75	2	2	1	2	2	2	2	2	1	2	2	2	2	2	2	2	2	1	1
339241-339233-33506578	15.01	2	2	2	2	2	2	2	2	2	2	2	2	2	2	2	2	2	2	2
339241-339233-33506626	15.08	2	1	2	2	2	2	2	2	2	2	2	1	1	2	2	2	2	1	1
339241-339233-33507282	15.32	2	2	1	2	2	2	2	1	1	2	2	2	2	2	2	2	2	2	1
339241-339233-33507788	15.87	2	2	2	2	1	2	2	2	2	2	2	1	2	2	2	2	2	2	2
339241-339233-33509108	16.17	1	1	2	2	2	1	2	2	2	2	2	2	1	2	2	2	2	1	1
339241-339233-33509221	16.09	2	2	2	2	2	2	2	1	2	2	2	2	2	2	2	2	2	2	2
339241-339233-33509228	15.92	2	2	2	2	2	2	2	2	2	2	2	2	1	2	1	2	2	2	2
339241-339233-33509956	16.4	1	2	2	2	2	2	2	2	2	2	2	2	2	2	2	2	2	2	2
339241-339233-33510129	16.69	2	2	2	2	2	1	2	2	1	2	2	2	2	2	2	2	2	1	1
339241-339233-33510232	17.09	2	2	2	2	2	2	2	2	1	2	2	2	2	2	2	2	2	1	1
339241-339233-33511499	17.56	1	2	2	2	2	2	2	2	2	2	2	2	2	2	2	2	2	2	2
339241-339233-33512345	17.8	1	1	2	2	2	2	2	2	2	2	2	2	1	2	2	2	2	2	1
339241-339233-33512652	5.01	1	1	2	2	2	1	2	2	2	2	2	2	2	2	2	2	2	2	1
339241-339233-33512706	18.71	1	2	1	2	1	2	2	2	2	2	2	2	2	2	2	2	2	2	2
339241-339233-33515018	5.3	2	2	2	2	2	2	2	2	2	2	2	2	2	2	2	2	2	2	2
339241-339233-33515534	5.5	1	2	2	2	2	2	2	2	2	2	2	2	2	2	2	2	2	2	2
339241-339233-33517204	5.54	1	2	2	2	2	2	2	2	2	2	2	2	2	2	1	2	2	2	2
339241-339233-33518042	5.63	2	2	2	2	2	2	2	2	2	2	2	2	2	2	2	2	2	2	2
339241-339233-33518252	5.78	1	2	2	2	2	2	2	2	2	2	2	1	1	1	2	2	1	2	1
339241-339233-33519240	5.81	2	2	2	2	2	2	2	2	2	2	2	2	2	2	2	2	2	2	2
339241-339233-33519272	5.95	2	1	2	1	1	2	2	2	2	2	2	2	1	2	2	2	2	2	1
339241-339233-33519500	5.88	2	2	2	2	2	2	2	2	2	2	2	2	2	2	2	2	2	2	2
339241-339233-33520090	6.29	1	1	1	2	2	2	2	2	2	2	2	2	1	2	2	2	2	2	1
339241-339233-33520493	6.58	1	2	2	2	2	2	2	2	2	2	2	1	1	2	2	2	2	2	1
339241-339233-33520499	5.99	1	2	2	2	2	2	2	2	2	2	2	2	2	2	2	2	2	2	2
339241-339233-33520552	6.27	1	1	2	2	2	2	2	2	2	2	2	2	1	2	2	2	2	1	1
339241-339233-33520820	6.51	1	2	2	2	2	2	2	2	2	2	2	2	2	2	2	2	2	2	2
339241-339233-33521945	6.65	1	1	2	2	2	2	2	1	2	2	2	2	2	2	2	2	2	2	1
339241-339233-33522570	6.59	2	2	2	2	2	2	2	2	2	2	2	2	2	2	2	2	2	2	2
339241-339233-33523593	6.72	1	2	2	2	2	2	2	2	2	2	2	2	2	2	2	2	2	2	2
339241-339233-33526339	6.84	2	2	2	2	2	1	2	2	2	2	2	2	2	2	2	2	2	2	2
339241-339233-33526743	7.28	2	2	2	2	2	2	2	1	2	2	1	2	2	2	2	2	2	2	1
339241-339233-33526945	7.16	1	2	2	2	2	2	2	2	2	2	2	2	2	2	2	2	2	2	2
339241-339233-33527356	7.23	1	2	1	1	1	2	2	2	2	2	2	2	1	2	2	2	2	2	2
339241-339233-33528062	7.42	1	2	2	2	2	2	2	2	2	2	2	2	2	2	2	2	2	2	2
339241-339233-33528785	7.65	2	2	2	2	2	2	2	2	1	2	2	2	2	2	2	1	2	1	1
339241-339233-33528789	7.66	1	2	2	2	2	2	2	2	2	2	2	2	1	2	1	2	2	1	1
339241-339233-33528864	8.31	1	2	1	2	1	1	2	2	2	2	2	1	2	2	2	2	2	2	1
339241-339233-33529525	7.78	2	1	2	2	2	2	2	2	2	2	2	2	2	2	2	2	2	2	2
339241-339233-33529589	8.12	1	2	2	2	2	2	2	2	2	2	2	2	2	2	2	2	2	2	2
339241-339233-33529755	7.86	1	1	2	1	1	2	2	2	2	2	2	1	1	2	2	2	2	2	1
339241-339233-33529803	8.83	1	2	2	2	2	2	2	2	1	2	2	2	1	2	1	1	2	1	1
339241-339233-33529834	8.71	2	1	2	2	2	1	2	2	2	2	2	1	1	2	2	2	2	2	1
339241-339233-33531099	8.84	2	2	2	2	1	2	2	2	2	2	2	2	2	2	2	2	2	2	2
339241-339233-33531351	9	1	2	2	2	2	2	2	2	2	2	2	1	2	2	2	2	2	2	2
339241-339233-33531385	9.05	1	1	2	2	1	1	2	2	2	2	2	2	1	2	2	2	2	2	1
339241-339233-33531561	9.06	1	2	2	2	1	2	2	1	1	2	2	1	1	2	2	2	2	1	1
339241-339233-33531652	9.13	1	1	2	2	2	2	2	2	1	2	2	1	1	2	2	2	2	1	1
339241-339233-33532293	9.22	1	2	2	2	2	2	2	2	2	2	2	2	2	2	2	2	2	2	2
339241-339233-33532546	9.48	2	2	2	2	2	2	2	2	1	2	2	2	2	2	2	2	2	1	1
339241-339233-33532660	9.51	1	2	2	2	2	2	2	2	2	2	2	2	2	2	2	2	2	2	2
339241-339233-33532666	9.47	2	2	2	2	2	2	2	2	2	2	2	2	2	2	2	2	2	2	1
339241-339233-33533500	9.51	2	2	2	2	2	2	2	2	2	2	2	2	2	2	2	2	2	2	2
339241-339233-33534449	9.58	1	2	2	2	1	1	2	2	1	2	2	1	1	2	2	2	2	2	2
339241-339233-33535134	9.61	1	2	2	2	2	2	2	2	2	2	2	2	2	2	2	2	2	2	2
339241-339233-33535264	9.73	1	2	2	2	2	2	2	2	2	2	1	2	2	2	2	2	2	2	2
339241-339233-33535325	9.68	2	1	2	2	2	1	2	2	1	2	2	2	1	2	2	2	2	1	1
339241-339233-33535663	9.75	1	1	1	2	2	2	2	2	2	2	2	2	1	2	2	2	2	2	1
339241-339233-33535744	9.75	2	2	2	1	1	2	2	2	2	2	2	2	2	2	2	2	2	2	2
339241-339233-33535988	9.83	2	2	2	2	2	2	2	2	2	2	2	2	2	2	2	2	2	2	2
339241-339233-33536127	9.87	2	2	2	2	2	2	2	2	2	2	2	2	2	2	2	2	2	2	2
339241-339233-33536553	9.88	2	1	2	2	2	2	2	2	2	2	2	2	2	2	2	2	2	2	1
339241-339233-33536849	10.23	1	2	2	2	2	2	2	2	2	2	2	2	2	2	2	2	2	2	2
339241-339233-33536995	10.28	2	1	2	2	2	2	2	2	2	2	2	1	1	2	2	2	2	1	1
339241-339233-33537148	10.39	1	1	2	2	2	2	2	2	2	2	2	2	2	2	2	2	2	2	2
339241-339233-33537393	10.6	1	2	2	2	2	2	2	2	2	2	2	2	2	2	1	2	2	1	1
339241-339233-33537451	10.68	2	2	2	2	2	2	2	2	2	2	2	2	2	2	2	2	2	2	2
339241-339233-33538572	10.76	1	2	2	2	2	2	2	2	1	1	1	2	1	2	2	2	2	1	1
339241-339233-33538625	10.76	2	2	2	2	1	2	2	2	2	2	2	2	2	2	2	2	2	2	2
339241-339233-33539582	10.92	2	2	2	2	2	2	2	2	2	2	2	2	2	2	2	2	2	2	2
339241-339233-33541657	10.96	2	2	1	1	1	1	2	2	2	2	2	1	1	2	2	2	2	2	1
339241-339233-33542484	11.04	1	1	1	1	1	2	2	2	1	2	2	1	1	2	2	2	2	2	2
339241-339233-33543281	11.14	1	1	2	2	2	2	2	2	2	2	1	2	2	2	2	2	2	2	1
339241-339233-33544348	11.38	1	2	2	1	1	2	2	2	2	2	2	2	2	2	2	2	2	2	1
339241-339233-33547702	11.41	1	2	1	2	2	2	2	2	2	2	2	2	1	2	2	2	2	2	2
339241-339233-33559220	11.44	1	2	1	2	2	1	2	2	2	2	2	2	2	2	2	2	2	2	2
339241-339233-33562003	11.73	2	2	2	2	2	2	2	2	2	2	2	2	2	2	2	2	2	2	2
339241-339233-33562181	12.42	2	2	2	2	2	2	2	2	2	2	2	2	2	2	2	2	2	2	2
339241-339233-33564091	13.1	2	1	2	2	2	2	2	2	1	2	1	2	1	2	2	2	2	1	2
339241-339233-33575871	13.14	1	1	2	2	2	2	2	2	2	2	2	2	2	2	2	2	2	2	1
339241-339233-33577446	13.55	1	2	2	2	1	2	2	2	2	2	2	2	2	2	2	2	2	2	2
339241-339233-33578687	13.8	2	1	2	2	2	1	2	2	2	2	2	2	2	2	2	2	2	2	1
339241-339233-33579501	14	2	1	2	1	1	1	2	1	1	2	2	1	1	2	1	2	2	1	1
339241-339233-33580620	15.3	1	1	2	2	2	2	2	2	2	2	2	1	2	2	2	2	2	2	1
339241-339233-33580864	15.37	2	2	2	2	2	2	2	2	2	2	2	2	2	2	2	2	2	2	2
339241-339233-33581467	17.19	1	2	2	2	2	2	2	2	2	2	2	2	2	2	2	2	2	2	2
339241-339233-33581894	18.61	2	1	2	1	2	1	2	2	2	2	2	2	1	2	2	2	2	2	1
339241-339233-33585870	5.01	1	2	2	2	2	2	2	2	2	2	2	2	2	2	2	2	2	2	2
339241-339233-33586219	5.09	1	1	1	2	2	2	2	1	2	2	2	2	2	2	2	2	2	2	1
339241-339233-33589213	5.14	1	2	2	2	2	2	2	2	2	2	2	2	2	2	2	2	2	1	2
339241-339233-33590235	5.16	1	2	2	2	2	2	2	2	2	2	2	2	2	2	2	2	2	2	2
339241-339233-33594141	5.18	1	2	2	2	2	2	2	2	2	2	2	2	2	2	2	2	2	1	1
339241-339233-33594568	5.24	1	1	2	2	2	2	2	2	2	2	2	2	2	2	2	2	2	2	1
339241-339233-33599610	5.3	2	2	2	2	2	2	2	2	2	2	2	2	2	2	2	2	2	2	2
339241-339233-33601264	5.62	1	2	2	2	2	2	2	2	2	2	2	2	2	2	2	2	2	2	2
339241-339233-33601431	5.41	2	2	2	2	2	2	2	2	2	2	2	2	2	2	2	2	2	2	2
339241-339233-33604342	5.65	1	2	2	2	2	2	2	1	2	2	2	2	2	2	2	2	2	2	2
339241-339233-33612438	5.73	2	2	2	2	2	2	2	2	2	2	2	2	2	2	2	2	2	2	2
339241-339233-33616154	5.82	1	2	2	2	2	1	2	2	2	2	2	1	1	2	2	2	2	2	1
339241-339233-33618613	5.87	1	2	2	2	2	2	2	2	2	2	2	2	2	2	2	2	2	2	2
339241-339233-33626873	5.91	2	2	2	2	2	2	2	2	2	2	2	2	2	2	2	2	2	2	2
339241-339233-33626954	5.87	1	2	2	2	2	2	2	2	2	2	2	2	2	2	2	2	2	2	2
339241-339233-33630120	6.07	1	2	1	2	2	1	2	2	1	2	2	2	2	2	2	2	2	1	1
339241-339233-33630688	6.09	1	2	2	2	2	2	2	2	2	2	2	2	1	2	2	2	2	2	1
339241-339233-33631546	6.18	1	2	2	2	2	2	2	2	2	2	2	1	2	2	2	2	2	2	2
339241-339233-33631550	6.12	2	2	2	2	2	2	2	2	1	2	2	2	2	2	2	2	2	2	1
339241-339233-33635744	6.25	2	2	2	2	2	2	2	2	2	2	2	2	2	2	2	2	2	2	2
339241-339233-33641319	6.43	2	1	2	2	2	1	2	2	2	2	2	1	2	2	2	2	2	1	1
339241-339233-33641380	6.38	1	2	2	2	2	2	2	2	2	2	2	2	2	2	2	2	2	2	1
339241-339233-33641497	6.43	2	2	2	2	2	2	2	2	2	2	2	2	2	2	2	2	2	2	2
339241-339233-33642262	6.46	2	2	2	2	2	2	1	2	2	2	1	1	1	2	2	2	2	1	1
339241-339233-33642643	6.5	1	1	1	2	2	2	2	2	2	2	2	2	2	2	2	2	2	2	2
339241-339233-33643391	6.56	1	2	2	2	2	2	2	1	1	2	2	2	2	2	2	2	2	1	1
339241-339233-33644894	6.66	1	1	1	1	1	1	2	2	2	2	2	1	2	2	2	2	2	1	1
339241-339233-33648166	6.8	1	2	1	2	2	2	2	2	1	2	2	2	1	2	1	2	1	1	1
339241-339233-33650027	6.85	2	2	2	2	2	2	2	2	2	2	2	2	2	2	2	2	2	2	2
339241-339233-33660471	6.88	2	2	2	2	2	2	2	2	2	2	2	2	2	2	2	2	2	2	2
339241-339233-33671732	6.91	1	2	2	2	2	2	2	2	2	2	2	2	2	2	2	2	2	2	2
339241-339233-33673133	6.96	1	2	2	2	2	2	2	2	2	2	2	2	2	2	2	2	2	2	2
339241-339233-33677237	7.04	1	1	1	2	2	1	2	2	2	2	2	1	1	1	1	2	2	1	1
339241-339233-33678806	7.16	1	2	1	2	2	2	2	2	1	2	2	2	2	2	2	2	2	1	1
339241-339233-33690063	7.17	2	1	2	2	2	2	2	2	2	2	2	2	2	2	2	2	2	2	2
339241-339233-33690237	7.17	2	2	2	2	2	2	2	1	2	2	2	2	1	2	2	2	2	1	1
339241-339233-33690551	7.19	2	2	2	2	2	2	2	2	2	2	2	2	2	2	2	2	2	2	1
339241-339233-33691189	7.4	1	2	2	2	2	1	2	2	2	2	2	2	2	2	2	2	2	2	1
339241-339233-33691930	7.41	2	2	2	2	2	2	2	2	2	2	2	2	2	2	2	2	2	1	1
339241-339233-33692445	7.51	1	2	2	2	2	2	2	2	2	2	2	2	2	2	2	2	2	2	2
339241-339233-33692936	7.54	1	2	2	2	2	2	2	2	2	2	2	2	2	2	2	2	2	2	2
339241-339233-33693565	7.69	1	1	2	2	2	2	2	2	2	2	2	2	2	2	2	2	2	2	2
339241-339233-33694000	7.77	1	2	2	2	2	2	2	2	2	2	2	2	2	2	2	2	2	2	2
339241-339233-33696930	7.92	2	2	2	2	2	2	2	2	1	2	2	2	1	1	1	1	2	1	1
339241-339233-33699904	8.14	1	1	2	1	1	2	2	2	2	2	2	2	2	2	2	2	2	2	1
339241-339233-33706931	8.18	1	2	1	2	1	2	2	2	2	2	2	2	2	2	2	2	2	2	2
339241-339233-33730813	8.2	2	2	2	1	1	1	2	2	2	2	2	2	2	2	2	2	2	2	1
339241-339233-33747047	8.21	1	2	2	2	2	2	2	2	2	2	2	1	2	2	2	2	2	2	2
339241-339233-33752275	8.22	2	2	2	2	2	1	2	2	2	2	2	1	1	2	2	2	2	2	1
339241-339233-33771916	8.24	2	2	2	2	2	2	2	2	2	2	2	2	2	2	2	2	2	2	2
339241-339233-33772850	8.34	2	2	2	2	2	2	2	2	1	2	2	2	1	2	2	2	2	1	1
339241-339233-33806678	8.41	1	1	2	2	2	2	2	2	2	2	2	1	1	2	2	2	2	2	1
339241-339233-33828846	8.42	1	2	2	2	1	2	2	2	2	2	2	2	2	2	2	2	2	2	1
339241-339233-33836156	8.46	1	2	2	2	2	2	2	2	2	2	2	2	2	2	2	2	2	2	2
339241-339233-33836349	8.61	1	2	2	2	2	2	2	1	2	2	2	2	2	2	2	2	2	1	1
339241-339233-33836816	8.64	1	1	1	2	2	2	2	2	2	2	2	2	2	2	2	2	2	1	1
339241-339233-33837726	8.7	1	2	2	2	1	2	2	2	2	2	2	2	2	2	2	2	2	2	2
339241-339233-33838100	8.64	1	2	2	2	2	2	2	2	2	2	2	2	2	2	2	2	2	2	2
339241-339233-33839685	8.74	1	2	2	2	2	2	2	2	2	2	2	2	2	2	2	2	2	1	1
339241-339233-33850731	8.85	1	2	2	2	2	2	2	2	1	2	2	2	2	2	2	2	2	1	1
339241-339233-33861380	8.86	2	2	2	2	2	2	2	1	2	2	2	2	2	2	2	2	2	2	2
339241-339233-33873699	9.08	1	2	1	2	2	2	2	2	2	2	2	1	2	2	2	2	2	2	2
339241-339233-33903749	9.13	1	2	2	2	2	1	2	2	2	2	2	2	1	2	2	2	2	1	1
339241-339233-33920812	9.22	2	2	2	2	1	2	2	2	2	2	2	2	1	2	2	2	2	2	2
339241-339233-33958504	9.31	1	2	2	2	2	2	2	2	2	2	2	2	2	2	2	2	2	2	2
339241-339233-34043595	9.35	1	2	2	2	2	2	2	2	2	2	2	2	2	2	2	2	2	2	2
339241-339233-34113052	9.56	1	2	2	2	2	1	2	1	1	2	2	1	2	2	2	2	2	1	1
339241-339233-34125946	9.56	2	2	1	2	2	2	2	2	2	2	2	1	1	2	2	2	2	2	1
339241-339233-34128231	9.72	1	2	1	2	1	1	2	2	2	2	2	1	1	2	2	2	2	1	1
339241-339233-34134532	9.86	2	2	2	2	2	2	2	2	2	2	2	2	2	2	2	2	2	2	2
339241-339233-34142346	10.04	1	2	2	2	2	2	2	2	2	2	2	2	2	2	2	2	2	2	2
339241-339233-34179272	10.09	2	2	2	2	2	2	2	2	1	2	1	1	1	1	2	2	2	2	1
339241-339233-34182398	10.19	1	2	2	2	2	2	2	2	2	2	2	2	2	2	2	2	2	2	2
339241-339233-34187458	10.26	2	2	2	2	2	2	2	2	2	2	2	1	1	2	2	2	2	1	1
339241-339233-34208377	10.3	2	2	2	2	2	2	2	2	2	2	2	2	2	2	2	2	2	2	2
339241-339233-34221242	10.45	2	2	2	2	2	2	2	2	2	2	2	2	2	2	2	2	2	2	2
339241-339233-34234322	10.46	2	1	2	2	2	1	2	2	2	2	2	2	2	2	2	2	2	2	1
339241-339233-34261818	10.54	1	2	2	2	2	2	2	2	2	2	2	2	2	2	2	2	2	2	2
339241-339233-34399820	10.63	2	2	2	2	2	2	2	1	2	2	2	2	2	2	2	2	2	2	2
339241-339233-34400263	10.76	1	2	2	2	2	2	2	2	2	2	1	1	2	2	2	2	2	1	1
339241-339233-34400608	10.84	1	2	2	2	2	2	2	2	2	2	2	2	2	2	2	2	2	2	2
339241-339233-34400761	10.85	1	1	1	2	1	1	2	2	2	2	2	1	1	2	2	2	2	2	1
339241-339233-34401025	10.95	1	2	1	2	1	2	2	2	2	2	2	1	1	2	2	2	2	2	2
339241-339233-34401168	11.15	1	1	2	2	2	2	2	2	1	2	2	2	2	2	2	2	2	1	1
339241-339233-34401361	11.51	1	2	2	2	2	2	2	2	2	2	2	2	2	2	2	2	2	2	2
339241-339233-34401669	11.3	2	1	1	1	1	1	2	1	2	2	2	1	1	2	2	2	2	2	1
339241-339233-34401758	11.94	2	2	2	2	2	2	2	2	2	2	2	2	2	2	2	2	2	2	2
339241-339233-34401817	11.51	1	2	2	2	2	2	2	1	2	2	2	2	2	2	2	2	2	2	2
339241-339233-34403054	11.57	1	1	2	2	2	2	2	2	2	2	2	2	2	2	2	2	2	2	2
339241-339233-34403543	11.79	1	1	2	2	2	2	2	2	2	2	2	2	2	2	2	2	2	2	2
339241-339233-34403754	11.82	1	1	2	2	2	2	2	2	1	2	2	2	1	2	1	2	2	1	1
339241-339233-34403933	12.23	2	1	1	2	2	2	2	2	2	2	2	2	2	2	2	2	2	2	2
339241-339233-34404385	11.88	2	2	2	2	1	2	2	2	2	2	2	2	1	2	2	2	2	2	2
339241-339233-34407057	12.34	1	2	2	2	2	2	2	1	2	2	2	2	2	2	2	2	2	2	1
339241-339233-34407371	12.06	2	1	1	2	2	2	2	2	2	2	2	2	1	2	1	2	2	2	1
339241-339233-34408680	12.51	1	2	2	2	2	2	2	2	2	2	2	2	1	2	2	2	2	2	1
339241-339233-34410016	12.56	2	1	2	2	2	1	2	2	2	2	2	2	1	2	2	2	2	1	1
339241-339233-34410595	12.86	2	2	2	2	2	2	2	2	2	2	2	2	1	2	1	2	2	2	2
339241-339233-34410977	12.96	1	2	2	2	2	2	2	2	2	2	2	2	2	2	2	2	2	2	2
339241-339233-34412691	13.18	1	2	2	2	2	2	2	2	2	2	2	2	2	2	2	2	2	2	2
339241-339233-34412735	12.98	2	2	2	2	2	2	2	2	1	2	2	2	1	2	1	2	2	1	1
339241-339233-34416118	13.21	1	2	2	2	1	2	2	1	2	2	2	2	1	2	2	2	2	2	2
339241-339233-34416577	13.43	1	2	2	2	2	2	2	2	2	2	2	2	2	2	2	2	2	2	2
339241-339233-34419418	13.54	1	2	2	2	2	2	2	2	2	2	2	2	2	2	2	2	2	2	2
339241-339233-34420304	13.95	1	2	2	2	2	2	2	2	1	2	2	2	2	2	2	2	2	1	1
339241-339233-34420401	14.36	2	2	2	2	1	2	2	1	2	2	2	1	2	2	2	2	2	2	2
339241-339233-34422816	14.49	1	1	1	2	1	1	2	2	1	2	2	2	1	2	2	2	2	1	1
339241-339233-34423490	15.15	1	2	2	2	1	2	2	2	2	2	2	2	2	2	2	2	2	2	2
339241-339233-34423506	14.79	1	2	2	1	1	2	2	2	2	2	2	2	2	2	2	2	2	2	2
339241-339233-34423729	15.35	1	2	2	2	2	2	2	2	2	2	2	2	2	2	2	2	2	2	2
339241-339233-34425241	15.36	1	2	2	2	2	2	2	1	2	2	2	2	2	2	2	2	2	2	2
339241-339233-34426382	15.64	2	2	2	2	2	2	2	2	2	2	2	2	2	2	2	2	2	2	2
339241-339233-34431000	15.81	2	2	2	2	2	2	2	2	2	2	2	2	2	2	2	2	2	2	2
339241-339233-34431261	15.95	2	2	2	2	2	2	2	2	2	2	2	1	2	2	2	2	2	2	2
339241-339233-34433551	15.97	2	2	2	2	2	2	2	2	1	2	2	2	1	2	1	1	2	2	1
339241-339233-34435572	16.03	2	2	2	2	2	2	2	2	2	2	2	2	2	2	2	2	2	2	2
339241-339233-34435711	16.31	2	2	2	2	2	2	2	2	1	2	2	2	2	2	2	2	2	2	2
339241-339233-34435718	16.41	2	2	2	2	2	2	2	2	2	2	2	2	2	2	2	2	2	2	2
339241-339233-34435880	16.48	1	2	2	2	2	2	2	2	1	2	2	1	2	2	2	2	2	2	1
339241-339233-34436767	16.66	2	2	2	2	2	2	2	2	2	2	2	2	2	2	2	2	2	2	2
339241-339233-34437714	17.02	1	2	2	2	2	2	2	2	2	2	2	2	2	2	2	2	2	2	2
339241-339233-34437991	17.64	2	1	2	1	2	1	2	2	1	2	2	2	1	2	2	2	2	1	1
339241-339233-34438585	18.88	1	2	2	2	2	2	2	2	2	2	2	2	2	2	2	2	2	2	2
339241-339233-34439961	5.11	1	1	2	2	2	2	2	2	2	2	2	2	2	2	2	2	2	2	1
339241-339233-34440232	5.4	1	2	2	2	2	1	2	2	2	2	2	2	2	2	2	2	2	2	2
339241-339233-34440404	5.48	2	2	2	2	2	2	2	2	2	2	2	2	2	2	2	2	2	2	2
339241-339233-34441376	5.54	1	2	2	2	2	2	2	2	2	2	2	2	2	2	2	2	2	1	1
339241-339233-34442025	5.58	1	2	2	2	2	2	2	2	2	2	2	2	2	2	2	2	2	2	2
339241-339233-34447220	5.6	2	2	2	2	2	2	2	2	2	2	2	2	2	2	2	2	2	2	2
339241-339233-34450156	5.8	1	2	2	2	2	2	2	2	2	2	2	2	2	2	2	2	2	2	2
339241-339233-34456491	5.86	2	2	2	2	2	2	2	2	2	2	2	2	2	2	2	2	2	2	2
339241-339233-34477403	5.94	2	2	2	2	2	2	2	1	2	2	2	2	2	2	2	2	2	2	1
339241-339233-34477855	6.24	2	2	2	2	2	2	2	2	2	2	2	2	2	2	2	2	2	2	2
339241-339233-34478517	6.27	1	1	2	2	2	2	2	2	2	2	2	1	2	2	2	2	2	1	1
339241-339233-34479108	6.33	1	2	2	2	2	2	2	2	2	2	2	2	2	2	2	2	2	2	1
339241-339233-34483415	6.34	2	2	2	2	2	2	2	2	2	2	2	2	2	2	2	2	2	2	1
339241-339233-34483652	6.56	1	2	2	2	2	2	2	2	2	2	2	2	2	2	2	2	2	2	1
339241-339233-34484085	6.57	2	2	2	2	2	2	2	2	2	2	2	2	2	2	2	2	2	2	2
339241-339233-34485090	6.67	2	2	2	2	2	2	2	2	2	2	2	2	2	2	2	2	2	2	2
339241-339233-34485734	7	2	1	1	2	2	2	2	1	1	2	2	2	1	2	2	2	2	2	1
339241-339233-34485919	7.02	2	2	2	2	2	2	2	2	2	2	2	2	2	2	2	2	2	2	2
339241-339233-34485995	7.08	1	2	1	2	2	2	2	2	2	2	2	2	1	2	1	2	2	2	2
339241-339233-34486998	7.2	1	1	2	2	2	2	2	2	2	2	2	2	2	2	2	2	2	2	2
339241-339233-34488003	7.38	2	2	2	2	2	2	2	2	2	2	2	2	2	2	2	2	2	2	2
339241-339233-34488744	7.46	1	2	2	2	2	2	2	2	2	2	2	2	2	2	2	2	2	2	2
339241-339233-34489490	7.51	1	2	2	2	2	2	2	1	2	2	2	2	2	2	2	2	2	2	2
339241-339233-34490254	7.55	2	2	1	2	2	2	2	2	2	2	2	2	1	2	2	2	2	2	2
339241-339233-34490379	7.72	2	2	2	2	1	2	2	2	2	2	2	1	2	2	2	2	2	2	2
339241-339233-34491185	7.9	2	2	2	2	2	2	2	2	1	2	2	2	1	2	2	1	2	1	1
339241-339233-34493574	8.05	1	2	2	2	2	2	2	2	2	2	2	2	2	2	2	2	2	2	2
339241-339233-34495632	8.25	1	1	1	2	2	2	2	2	1	2	2	2	1	2	1	2	1	1	1
339241-339233-34498895	8.29	2	2	1	2	1	2	2	2	1	2	2	2	2	2	2	2	2	2	1
339241-339233-34508069	8.37	1	2	2	2	1	2	2	2	2	2	1	1	1	2	1	2	2	2	1
339241-339233-34520288	8.57	1	2	2	2	1	2	2	1	2	2	2	2	2	2	2	2	2	2	2
339241-339233-34523098	8.69	2	2	2	2	2	2	2	2	2	2	2	2	2	2	2	2	2	2	2
339241-339233-34524756	8.82	2	2	1	2	1	2	2	2	2	2	2	2	2	2	2	2	2	2	2
339241-339233-34526888	8.86	1	2	2	2	2	2	2	2	2	2	2	2	1	2	1	2	2	2	1
339241-339233-34527354	8.86	1	2	2	2	1	2	2	2	2	2	2	2	2	2	2	2	2	2	2
339241-339233-34528145	8.91	1	2	2	2	2	2	2	2	1	2	2	2	2	2	2	2	2	2	1
339241-339233-34528717	9	1	2	2	2	2	1	2	2	1	2	2	2	2	2	2	2	2	2	1
339241-339233-34530851	9.08	1	2	2	2	2	2	2	2	2	2	2	2	2	2	2	2	2	2	2
339241-339233-34531003	9.17	2	1	1	2	2	2	2	2	2	2	2	2	1	2	2	2	2	2	1
339241-339233-34531995	9.24	1	1	2	2	2	1	2	2	1	2	2	2	2	2	2	2	2	1	1
339241-339233-34532260	9.32	1	2	2	2	2	2	2	2	2	2	2	2	2	2	2	2	2	2	2
339241-339233-34533535	9.74	1	2	2	2	2	2	2	2	2	2	2	2	2	2	2	2	2	2	1
339241-339233-34534560	9.77	2	2	2	1	1	2	2	2	2	2	2	2	2	2	2	2	2	2	2
339241-339233-34535440	9.79	1	1	1	2	1	1	2	2	2	2	2	2	2	2	2	2	2	2	1
339241-339233-34535661	9.84	2	2	2	1	1	2	2	2	2	2	2	2	1	2	2	2	2	2	2
339241-339233-34536216	9.9	2	1	2	2	2	2	2	2	2	2	2	2	1	2	1	2	2	2	2
339241-339233-34536916	10.26	1	2	2	2	2	2	2	2	1	2	2	2	2	2	2	2	2	1	1
339241-339233-34537200	10.42	2	2	2	2	2	2	2	2	2	2	2	2	2	2	2	2	2	2	2
339241-339233-34537530	10.44	2	1	2	2	2	2	2	2	2	2	2	2	2	2	2	2	2	2	2
339241-339233-34537609	10.53	2	2	1	2	2	1	2	2	2	2	2	2	1	2	2	2	2	2	1
339241-339233-34540789	10.56	1	2	2	2	2	2	2	2	2	2	2	2	2	2	2	2	2	2	2
339241-339233-34543915	10.98	2	1	1	2	2	2	2	2	1	2	2	2	2	2	1	1	2	1	1
339241-339233-34546189	11.19	1	1	2	2	2	2	2	2	2	2	2	2	2	2	2	2	2	2	1
339241-339233-34547281	11.3	1	1	2	2	2	2	2	2	1	2	2	2	1	2	2	2	2	2	1
339241-339233-34556772	11.43	2	2	2	2	2	2	2	2	2	2	2	2	2	2	2	2	2	2	2
339241-339233-34558318	11.45	1	2	2	2	2	2	2	2	2	2	2	2	2	2	2	2	2	2	2
339241-339233-34562248	11.51	1	2	2	2	2	2	2	1	2	2	2	2	2	2	2	2	2	2	2
339241-339233-34563137	11.7	1	2	1	2	2	2	2	2	2	2	2	2	2	2	2	2	2	2	1
339241-339233-34566779	11.86	1	2	2	2	2	2	2	2	2	2	2	2	2	2	2	2	2	2	2
339241-339233-34588742	13.2	2	2	2	2	2	2	2	2	2	2	2	2	2	2	2	2	2	2	2
339241-339233-34599276	13.52	2	1	1	2	1	1	2	2	2	2	2	1	1	2	2	2	2	1	1
339241-339233-34617500	13.56	2	1	1	2	2	1	2	2	2	2	2	2	1	2	2	2	2	2	1
339241-339233-34617590	13.71	1	2	2	2	2	2	2	2	2	2	2	2	2	2	2	2	2	2	2
339241-339233-34620249	14.42	2	2	1	2	2	2	2	2	2	2	2	1	2	2	2	2	2	2	2
339241-339233-34646018	14.54	1	2	2	2	2	2	2	2	2	2	2	2	2	2	2	2	2	2	1
339241-339233-34675662	14.74	2	1	1	2	2	2	2	1	2	2	2	1	2	2	2	2	2	2	1
339241-339233-34676691	14.92	2	2	2	2	2	2	2	2	2	2	2	2	2	2	2	2	2	2	2
339241-339233-34676940	18.58	1	2	2	2	2	2	2	2	1	2	2	1	1	2	1	1	2	1	1
339241-339233-34677123	17.18	1	2	2	2	1	2	2	2	2	2	1	2	2	2	2	2	2	2	2
339241-339233-34678034	5.1	1	1	2	2	2	2	2	2	2	2	2	2	2	2	2	2	2	2	1
339241-339233-34679101	5.25	1	2	2	2	2	2	2	2	2	2	2	2	2	2	2	2	2	2	2
339241-339233-34680306	5.29	1	1	2	2	2	2	2	2	2	2	2	2	1	2	2	2	2	2	1
339241-339233-34680735	5.3	1	2	2	2	2	2	2	2	2	2	2	2	2	2	2	2	2	2	2
339241-339233-34681401	5.36	1	2	2	2	2	2	2	2	2	2	2	2	2	2	2	2	2	2	2
339241-339233-34683133	5.73	2	1	2	2	2	2	2	2	2	2	2	1	2	2	2	2	2	1	1
339241-339233-34683196	5.61	1	2	2	2	2	2	2	1	2	2	2	2	2	2	2	2	2	2	2
339241-339233-34685681	5.91	1	2	2	2	2	2	2	2	2	2	2	2	2	2	2	2	2	2	2
339241-339233-34685804	5.91	1	1	2	2	2	2	2	2	2	2	2	2	2	2	2	2	2	1	1
339241-339233-34686152	5.93	1	2	2	2	2	2	2	2	2	2	2	2	2	2	2	2	2	2	2
339241-339233-34686670	6.1	1	1	2	2	2	1	2	2	2	2	2	2	2	2	2	2	2	1	1
339241-339233-34686677	5.98	1	2	2	2	2	2	2	2	2	2	2	2	2	2	2	2	2	2	2
339241-339233-34687586	6.14	1	2	2	2	2	2	2	2	2	2	2	2	2	2	2	2	2	2	2
339241-339233-34687818	6.15	2	2	2	2	2	2	2	2	2	2	2	1	2	2	2	2	2	2	2
339241-339233-34689935	6.61	1	1	2	2	2	2	2	2	2	2	2	2	1	2	2	2	2	2	1
339241-339233-34690218	6.75	1	2	2	2	2	2	2	2	2	2	2	2	2	2	2	2	2	2	2
339241-339233-34690771	6.64	1	2	2	2	2	2	2	2	2	2	2	2	2	2	2	2	2	2	2
339241-339233-34691615	6.78	2	1	2	2	2	2	2	2	1	2	1	1	1	2	1	2	2	1	1
339241-339233-34692221	6.78	1	2	2	2	2	2	2	2	2	2	2	2	2	2	2	2	2	2	2
339241-339233-34694604	6.81	2	2	2	2	2	2	2	2	2	2	2	2	2	2	2	2	2	2	2
339241-339233-34694878	7.21	1	1	2	2	2	2	2	2	2	2	2	2	1	2	2	2	2	2	1
339241-339233-34695485	7.78	1	2	2	2	2	2	2	2	2	2	2	2	2	2	2	2	2	2	2
339241-339233-34696482	7.83	2	2	2	2	2	2	2	2	2	2	2	2	2	2	2	2	2	2	2
339241-339233-34696747	8.23	1	2	2	2	2	2	2	2	2	2	2	2	2	2	2	2	2	2	1
339241-339233-34696917	9.14	1	2	2	2	2	2	2	2	2	2	2	2	2	2	2	2	2	2	2
339241-339233-34698957	8.97	2	1	2	2	2	2	2	2	2	2	2	2	2	2	2	2	2	1	1
339241-339233-34699229	8.67	1	2	2	2	2	2	2	2	2	2	2	2	2	2	2	2	2	2	2
339241-339233-34699318	8.77	2	1	1	2	1	1	2	2	2	2	2	2	2	2	2	2	2	1	1
339241-339233-34705357	9.19	1	1	2	2	2	2	2	2	2	2	2	2	2	2	2	2	2	2	1
339241-339233-34706566	9.19	2	1	2	2	1	2	2	2	2	2	2	2	2	2	2	2	2	2	2
339241-339233-34706671	9.2	1	2	2	2	2	2	2	2	2	2	2	2	2	2	2	2	2	2	2
339241-339233-34708012	9.65	1	2	2	2	2	2	2	2	2	2	2	2	2	2	2	2	2	2	2
339241-339233-34708318	9.86	1	2	2	2	2	2	2	2	2	2	2	2	2	2	2	2	2	2	2
339241-339233-34710836	10.12	1	1	2	2	2	1	2	1	2	2	2	2	1	2	2	2	2	2	1
339241-339233-34724722	10.25	1	1	2	2	2	2	2	2	2	2	2	2	2	2	2	2	2	2	2
339241-339233-34728794	10.55	1	2	2	2	2	2	2	2	1	2	2	2	1	2	2	1	1	1	1
339241-339233-34745772	10.95	2	2	2	2	2	2	2	2	2	2	2	2	2	2	2	2	2	2	2
339241-339233-34759542	11.09	2	2	2	2	2	2	2	2	2	2	2	2	2	2	2	2	2	2	2
339241-339233-34787135	11.51	2	2	2	1	1	2	2	2	2	2	2	1	2	2	2	2	2	2	1
339241-339233-34795268	11.68	2	2	2	2	2	2	2	2	2	2	2	2	2	2	2	2	2	2	2
339241-339233-34985275	11.87	1	2	2	2	2	2	2	2	2	2	2	2	2	2	2	2	2	2	2
339241-339233-35044541	12.59	1	1	2	2	2	2	2	2	2	2	2	2	2	2	2	2	2	2	1
339241-339233-35117985	12.72	1	1	2	2	2	2	2	1	2	2	2	2	2	2	2	2	2	1	1
339241-339233-35196007	12.74	1	1	2	2	2	2	2	2	2	2	2	2	2	2	2	2	2	2	1
339241-339233-35198995	12.92	1	2	2	1	2	2	2	2	2	2	2	2	2	2	2	2	2	2	2
339241-339233-35202755	13.09	1	1	2	2	2	2	2	2	2	2	2	2	1	2	2	2	2	2	2
339241-339233-35215168	13.32	1	1	2	2	2	1	2	2	2	2	2	2	1	2	2	2	2	2	1
339241-339233-35215430	13.36	1	2	2	2	1	2	2	1	2	2	2	2	2	2	2	2	2	2	1
339241-339233-35216527	13.61	1	1	1	2	1	2	2	1	2	2	2	2	2	2	2	2	2	2	2
339241-339233-35217586	14.32	1	2	2	2	2	2	2	2	2	2	2	2	2	2	2	2	2	2	2
339241-339233-35218959	14.47	1	2	2	2	2	2	2	2	2	2	2	2	2	2	2	2	2	2	2
339241-339233-35219475	14.86	1	2	2	2	2	2	2	2	2	2	2	2	2	2	2	2	2	2	2
339241-339233-35219541	16.18	1	2	2	2	2	2	2	2	2	2	2	2	2	2	2	2	2	2	2
339241-339233-35221350	16.51	1	2	2	2	2	2	2	2	1	2	2	2	1	2	2	2	2	2	1
339241-339233-35226392	16.69	2	2	2	2	2	2	2	2	2	2	2	2	2	2	2	2	2	2	2
339241-339233-35228032	5.54	2	2	2	2	2	2	2	2	2	2	2	2	2	2	2	2	2	2	2
339241-339233-35237873	7.96	1	1	1	2	2	2	2	2	2	2	2	2	1	2	2	2	2	2	2
339241-339233-35247418	13.88	1	1	2	2	2	2	2	2	2	2	2	2	2	2	2	2	2	2	2
339241-339233-35250503	15.04	1	2	2	2	2	2	2	2	2	2	2	2	2	2	2	2	2	2	2
339241-339233-35277475	7.36	1	2	2	2	2	2	2	2	2	2	2	2	2	2	2	2	2	2	1
339241-339233-35281763	18.99	1	2	2	2	2	2	2	2	2	2	2	2	2	2	2	2	2	2	2
339241-339233-35452930	7.04	2	2	1	2	2	2	2	2	2	2	2	2	2	2	2	2	2	2	1
339241-339233-35470177	7.2	2	1	2	2	2	2	2	2	2	2	2	1	1	2	2	2	2	2	1
